# Supplementary material for: Superactivity of α-chymotrypsin with biological buffers, TRIS, TES, TAPS, and TAPSO in aqueous solutions
Source: Royal Society of Chemistry journal article supplement (doi:10.1039/c4ra09434d), 2014-10-08
Supplement: c4ra09434d1.pdf [file c4ra09434d1.pdf]

# Superactivity of $\alpha$ -Chymotrypsin with Biological Buffers, TRIS, TES, TAPS, and TAPSO in Aqueous Solutions

Bhupender S. Gupta<sup>a</sup>, Mohamed Taha<sup>b</sup> and Ming Jer Lee<sup>a</sup>

<sup>a</sup> Department of Chemical Engineering, National Taiwan University of Science and Technology, 43 Keelung Road, Section 4, Taipei 106-07, Taiwan

<sup>b</sup> CICECO, Departamento de Química, Universidade de Aveiro, 3810-193 Aveiro, Portugal

## Supporting Information

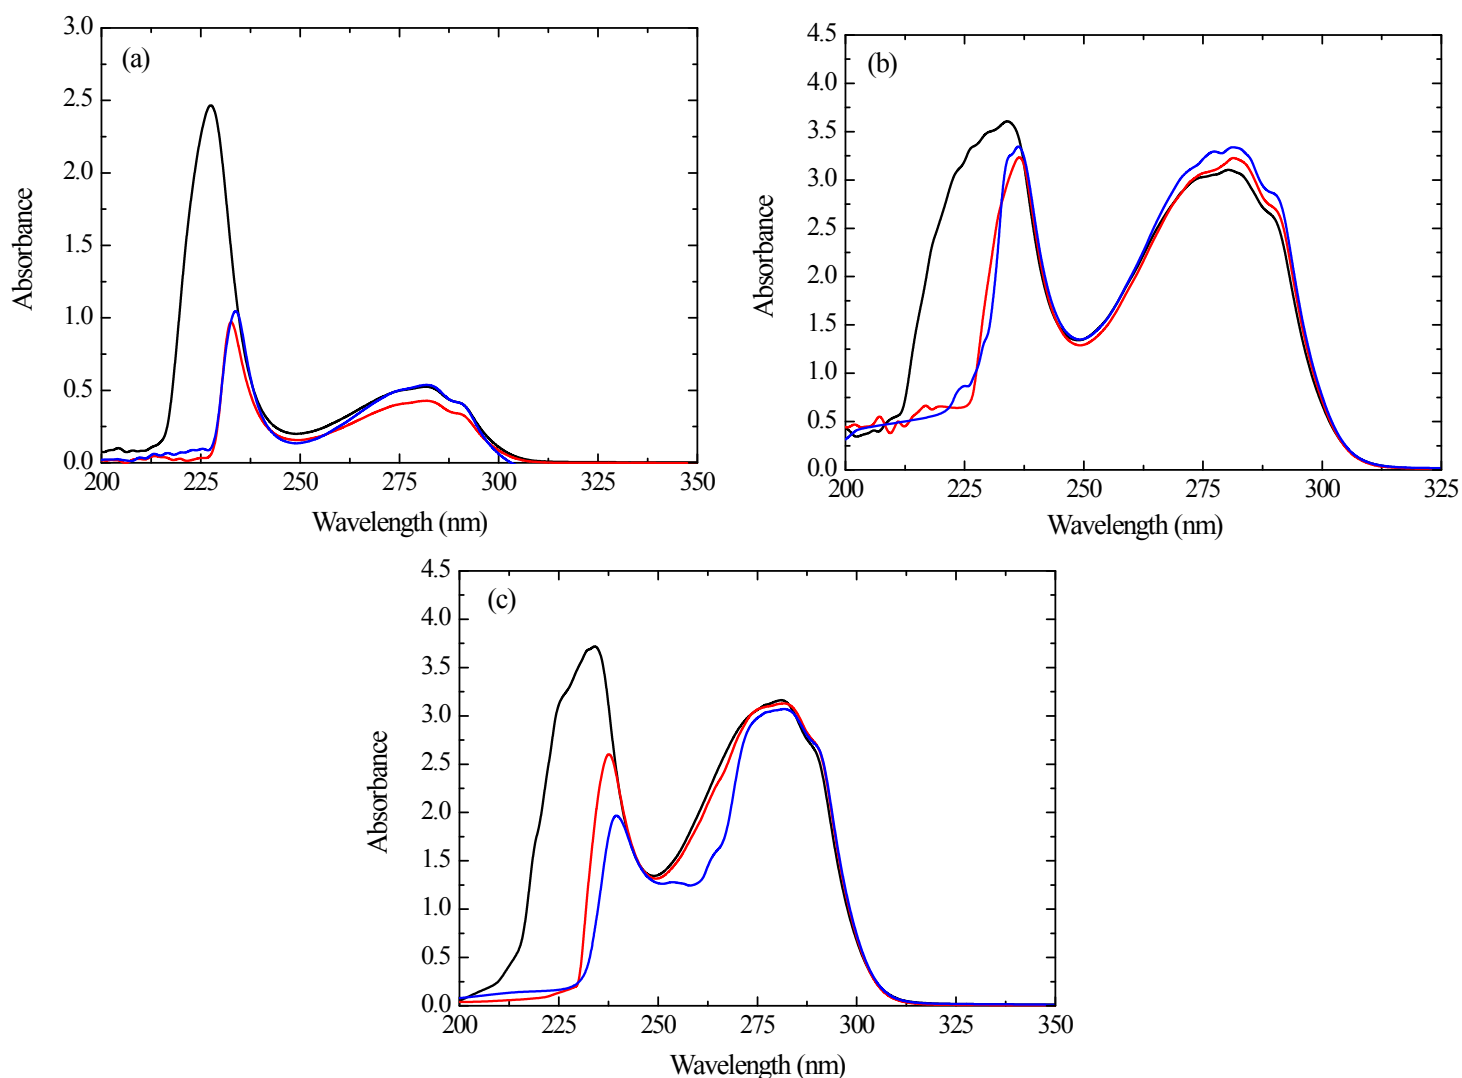

**Fig. 1S (a-c).** The UV-Visible measurements for  $\alpha$ -CT in 0.05 M, 0.5 M, and 0.7 M or 1.0 M TES (a), TAPS (b), and TAPSO (c) at 25 °C and pH = 8.0. Solid black line 0.05 M, solid red line 0.5 M, and solid blue line 1.0 M.

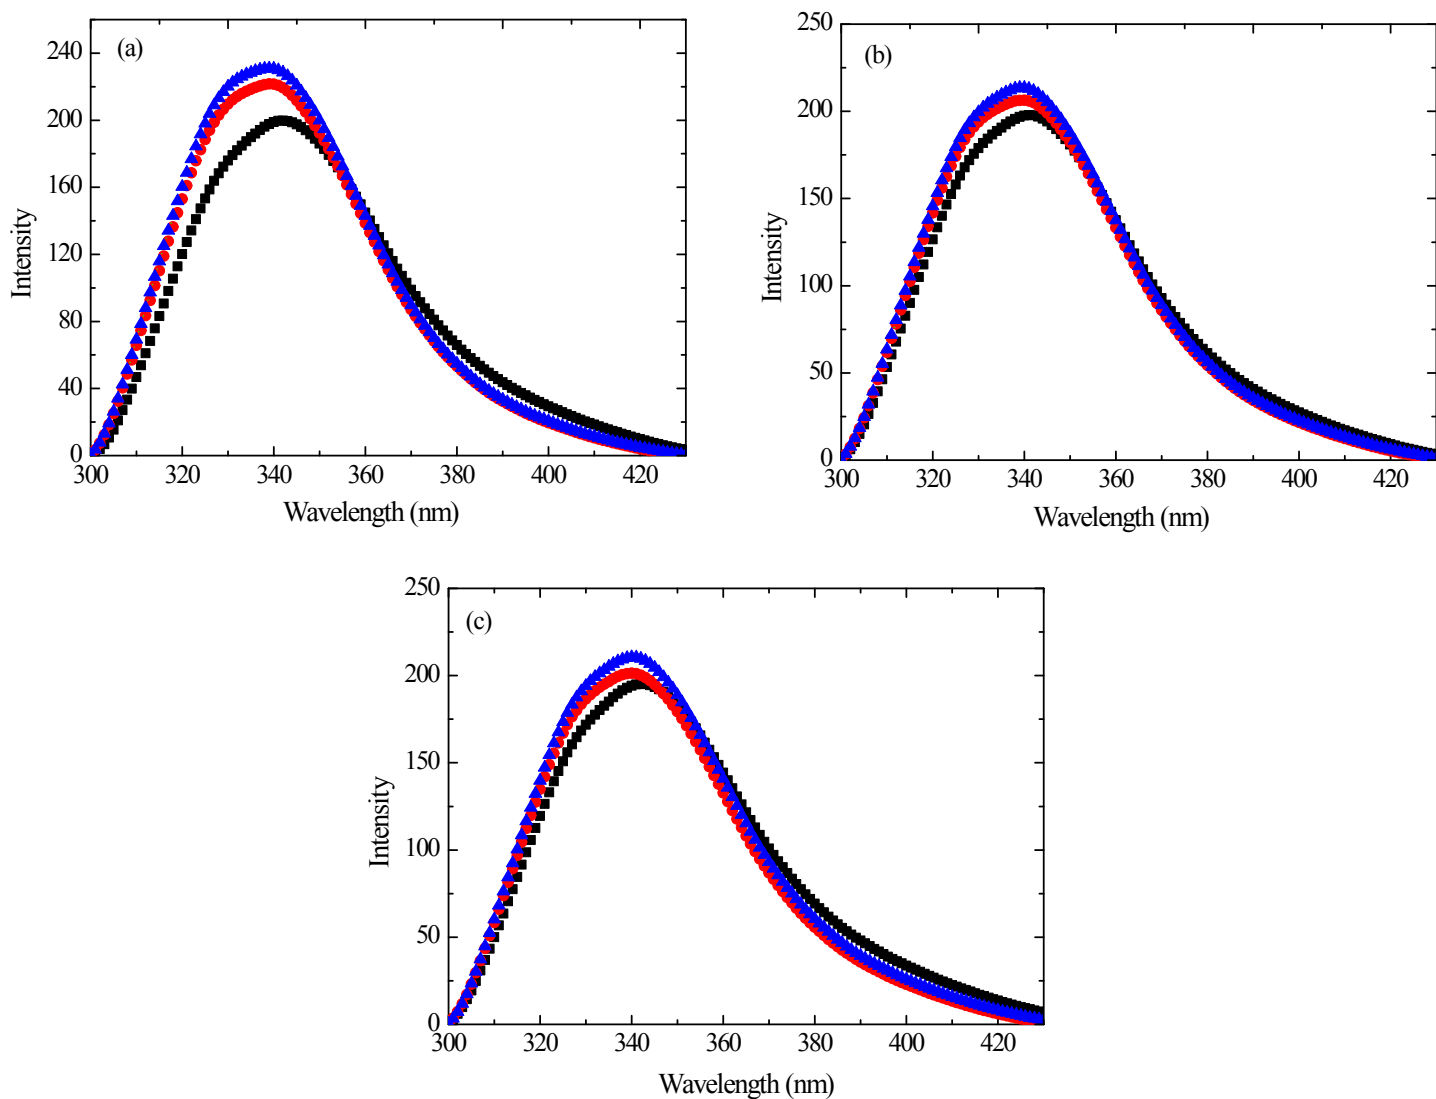

**Fig. 2S (a-c).** The emission fluorescence spectra for  $\alpha$ -CT in 0.05 M, 0.5 M, and 0.7 M or 1.0 M TES (a), TAPS (b), and TAPSO (c) at excited wavelength of 280 nm, 25 °C temperature and pH = 8.0: (■), 0.05M; (●), 0.5 M; (▲), 0.7 or 1.0 M

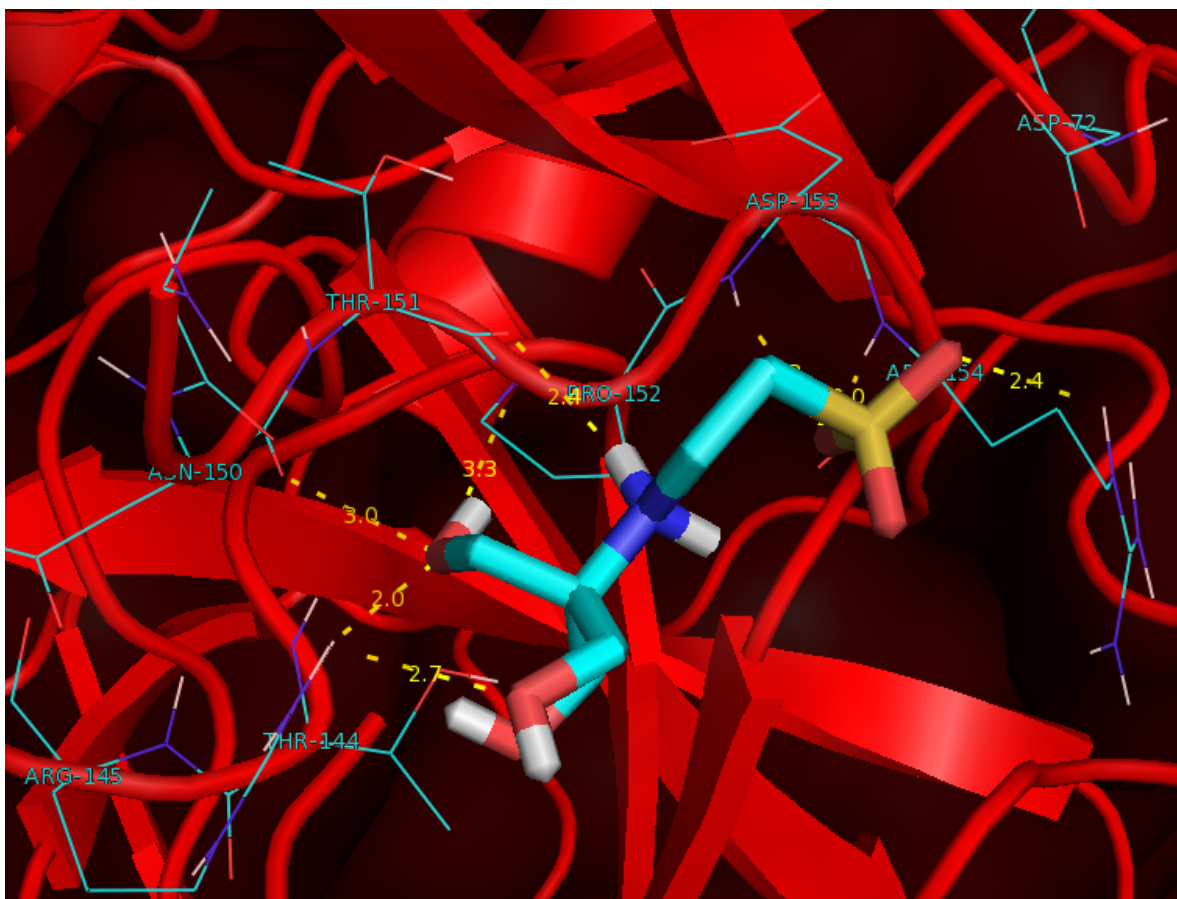

**Fig. 3S (a).** The hydrogen bond interactions of TES with  $\alpha$ -CT

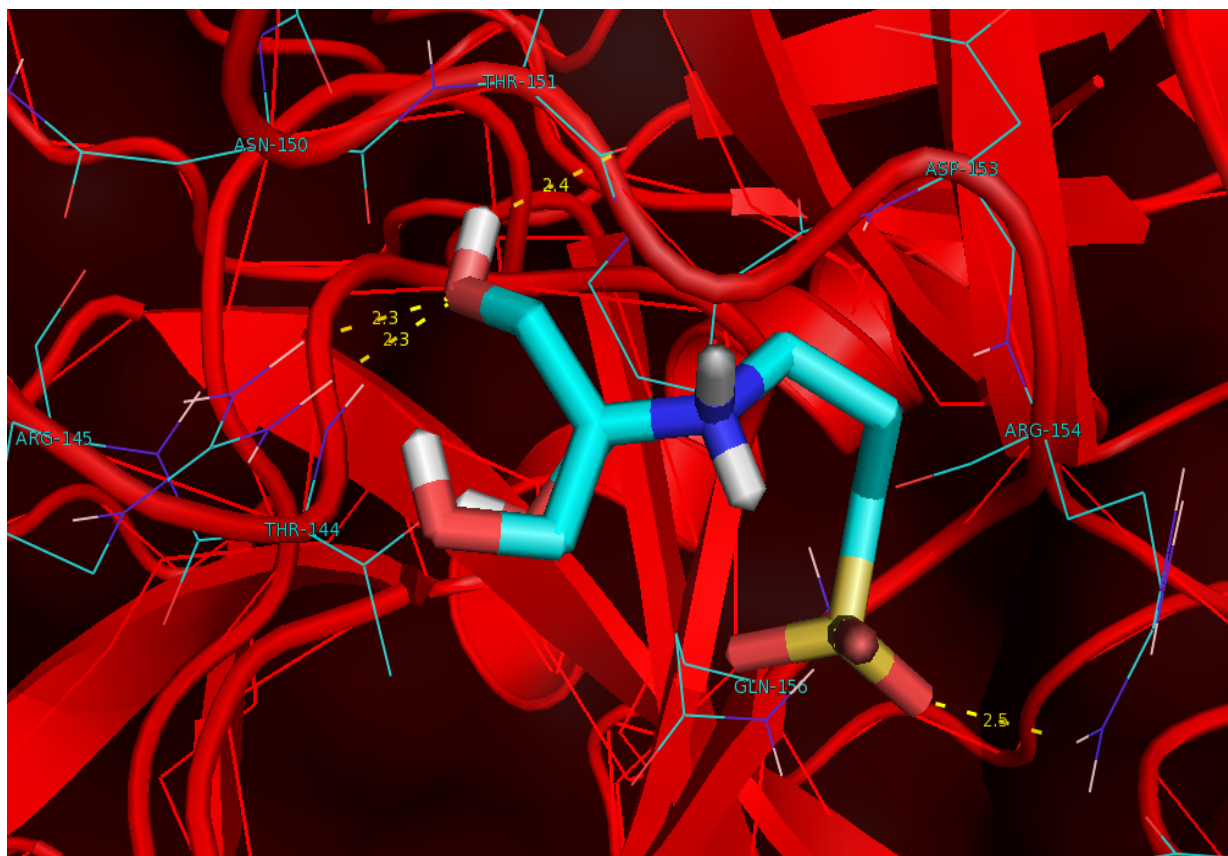

**Fig. 3S (b).** The hydrogen bond interactions of TAPS with  $\alpha$ -CT

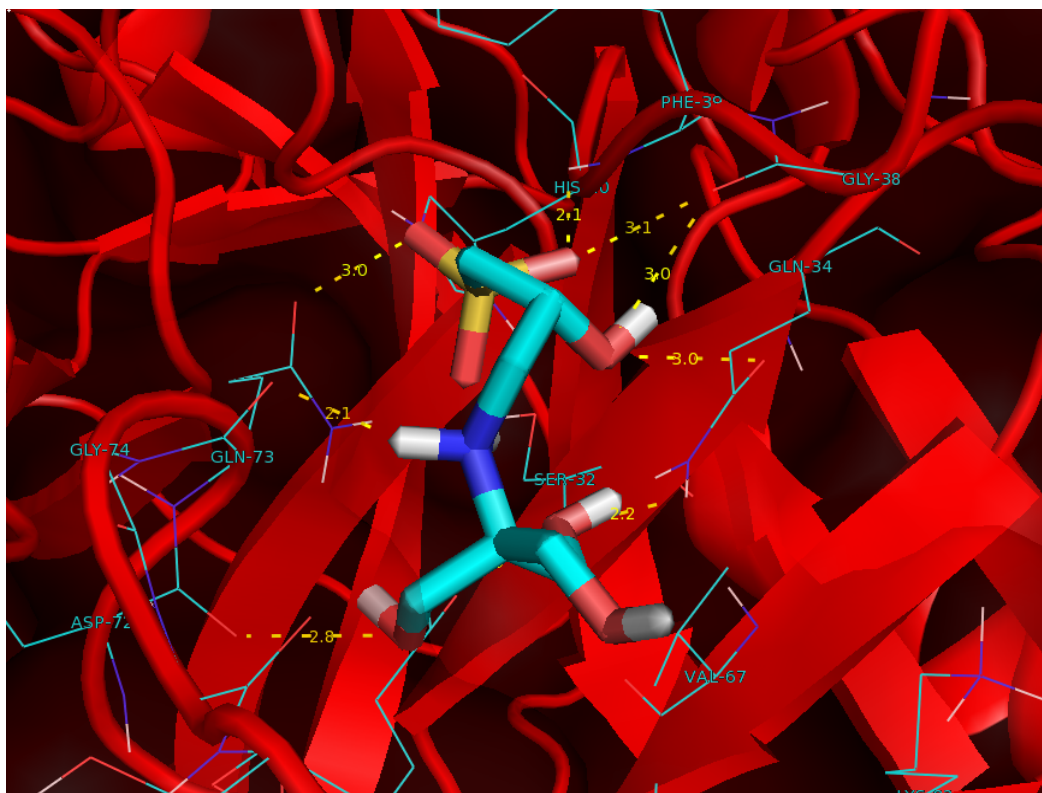

**Fig. 3S (c).** The hydrogen bond interactions of TAPSO with  $\alpha$ -CT
